# Supplementary material for: A facile and simple microwave-assisted synthesis method for mesoporous ultrathin iron sulfide nanosheets as an efficient bifunctional electrocatalyst for overall water splitting
Source: Royal Society of Chemistry journal article supplement (doi:10.1039/d2dt00019a), 2022-01-01
Supplement: d2dt00019a1.pdf [file d2dt00019a1.pdf]

## Supplementary Information

### **Facile and Simple Microwave-Assisted Synthesis Method for Mesoporous Ultrathin Iron Sulfide Nanosheets as an Efficient Bifunctional Electrocatalyst For Overall Water Splitting**

Nouraz Mushtaq<sup>1</sup>, Wang Zhitao<sup>1</sup>, Hassina Tabassum<sup>2</sup>, Muhammad Tahir<sup>1</sup>, Zhanli Han<sup>1</sup>, Youqi Zhu<sup>1\*</sup>, Waqar Younas<sup>1</sup>, Xilan Ma<sup>1</sup>, Chuanbao Cao<sup>1\*</sup>

<sup>1</sup>Research Center of Materials Science, Beijing Key Laboratory of Construction Tailorable Advanced Functional Materials and Green Applications, Beijing Institute of Technology, Beijing 100081, China.

<sup>2</sup>Department of Chemical and Biological Engineering, University at Buffalo, The State University of New York, Buffalo, New York 14260, USA.

#### **Material Characterization**

X-ray diffractometry (PANalytical XRD, with Cu K $\alpha$  radiation) was used for the investigation of crystallographic phase. Microstructures and morphology of samples were observed via field emission scanning electron microscopy (FESEM, JEOL JEM-2100 F) fortified with energy-dispersive X-ray spectroscopy (EDS), transmission electron microscopy (TEM, JSM- 2100F, 200 kV), and high-resolution TEM (HRTEM, FEI Tecnai G2 F20, 200 kV). Using Veeco instrument atomic force microscopy (AFM) had been performed. Brunauer-Emmett-Teller surface areas (BET) was used for investigation of the specific surface area. PHI Quantera II (Japan) with an Al K $\alpha$  = 280.00 eV excitation source was used for the measurements of X-ray photoelectron spectroscopy (XPS).

#### **Electrochemical Measurements**

Electrochemical work station (CHI-660E) had been utilized for HER and OER in a three electrode system. Two electrode schemes has been used for overall water splitting, and Ag/AgCl and Pt foil had obtained as reference and counter electrodes for electrochemical measurements.

In the engineering of working electrode, a water-resistant insulator mask was firmly taped on uncontaminated rectangular carbon fiber paper (CFP) (0.5 cm x 5 cm) to characterize a 3 mm diameter circular active area and 3.5 mg of Fe<sub>3</sub>S<sub>4</sub> was uniformly dissolved in water/ethanol solution (1/0.880 ml) and set it on sonication for 30 minutes, 60 µl of Nafion solution (Sigma Aldrich, 5wt%) were uniformly mixed and sonicated for 30 min. After that, catalytic electrode had been made through drop wise 4µl of the slurry on CFP and desiccated it at room temperature. Reversible Hydrogen Electrode used as a standard for all potentials as follows:

$$E(\text{RHE}) = E(\text{Ag}/\text{AgCl}) + 0.059 \text{ pH} + E_0$$

Overall water electrolyzer is prepared with 7µl of the ink had been coated on 0.05 cm × 1 cm active area of CFP electrode, earlier than testing dried out at room temperature.

### **Proposed reaction mechanism for OER**

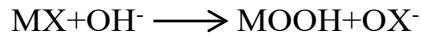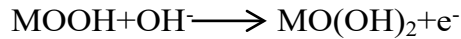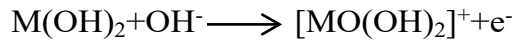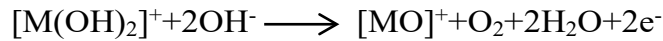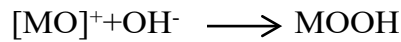

Here M is considered for Fe and X is considering for S.

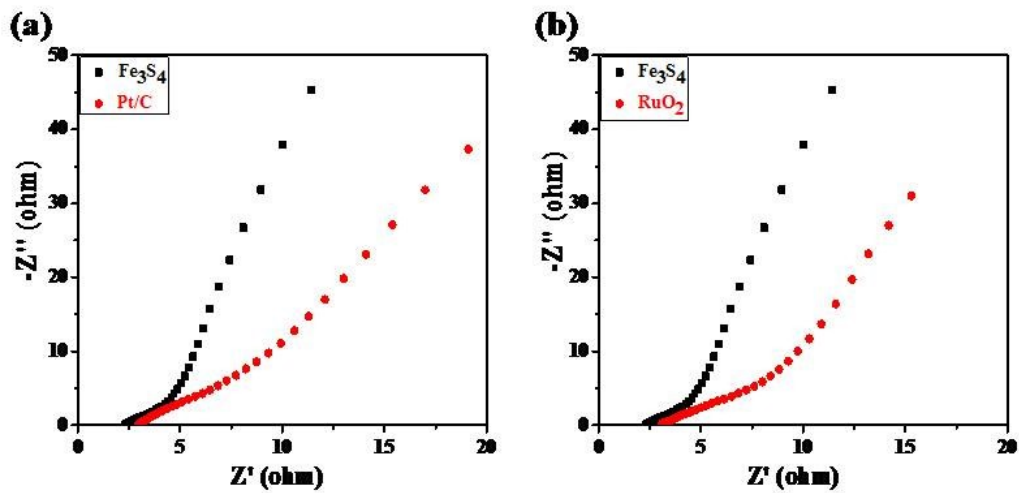

**Figure S1.**(a) Nyquist Plots of Pt/C and Fe<sub>3</sub>S<sub>4</sub>, (b) Nyquist Plots of RuO<sub>2</sub> and Fe<sub>3</sub>S<sub>4</sub>

**Table S1.**Comparison of the HER performances of Fe<sub>3</sub>S<sub>4</sub> with the best-reported iron sulfide and other reported non-precious HER electrocatalysts.

| Catalyst                                                | Morphology         | Electrolyte                          | Over potential ( $\eta_{10}$ )( mV) | Tafel Slope (mV dec <sup>-1</sup> ) | Ref.      |
|---------------------------------------------------------|--------------------|--------------------------------------|-------------------------------------|-------------------------------------|-----------|
| Fe <sub>3</sub> S <sub>4</sub>                          | Nanosheets         | 1 M KOH                              | 103                                 | 95                                  | This work |
| FeS <sub>2</sub> /C/NF                                  | Nanoparticles      | 1 M KOH                              | 202                                 | 98                                  | 1         |
| Fe@FeO <sub>x</sub> S <sub>y</sub> FeS <sub>2</sub>     | Nanoparticles      | 1 M KOH                              | 243 ( $\eta_{100}$ )                | 77                                  | 2         |
| FeS <sub>2</sub> -rGO                                   | Nanoparticles      | 0.5 M H <sub>2</sub> SO <sub>4</sub> | 139                                 | 66                                  | 3         |
| FeS <sub>2</sub> -RGO                                   | Lamellar Structure | 0.5 M H <sub>2</sub> SO <sub>4</sub> | 226                                 | 61                                  | 4         |
| FeNi <sub>0.20</sub> S <sub>2</sub>                     | Nanosheet          | 0.5 M H <sub>2</sub> SO <sub>4</sub> | 183                                 | 78.63                               | 5         |
| FeS <sub>2</sub> -doped Mo S <sub>2</sub>               | Nanoflower         | 0.5 M H <sub>2</sub> SO <sub>4</sub> | 136                                 | 82                                  | 6         |
| Fe <sub>3</sub> S <sub>4</sub>                          | Particles          | 1 M KOH                              | 279 ( $\eta_{50}$ )                 | 87.40                               | 7         |
| Fe <sub>0.9</sub> Co <sub>0.1</sub> S <sub>2</sub> /CNT | Nanosheet          | 0.5 M H <sub>2</sub> SO <sub>4</sub> | 120( $\eta_{20}$ )                  | 46                                  | 8         |
| CoNi <sub>2</sub> S <sub>4</sub> @CoS <sub>2</sub> /NF  | Microspheres       | 1 M KOH                              | 173                                 | 45                                  | 9         |

|                                                  |                  |                                     |     |       |    |
|--------------------------------------------------|------------------|-------------------------------------|-----|-------|----|
| NiCo <sub>2</sub> S <sub>4</sub>                 | Nanoparticles    | 1 M KOH                             | 282 | -     | 10 |
| Co <sub>9</sub> S <sub>8</sub>                   | Naonowires       | 1 M KOH                             | 217 | 110   | 11 |
| N-Ni <sub>3</sub> S <sub>2</sub> /NF             | Naonowires       | 1 M KOH                             | 105 | 108   | 12 |
| CoS <sub>2</sub>                                 | Nanospheres      | 1 M KOH                             | 193 | 100   | 13 |
| Co <sub>3</sub> S <sub>4</sub> -L                | Nanosheet        | 1 M KOH                             | 270 | 124.5 | 14 |
| Co(OH) <sub>2</sub> /NiCoS                       | Nanotubes        | 1 M KOH                             | 148 | 88    | 15 |
| Ni-S-B                                           | Microspheres     | 30%wt KOH                           | 240 | 121.2 | 16 |
| N-Ni <sub>3</sub> S <sub>2</sub> @C/NF           | Nanoflakes       | 1 M KOH                             | 113 | 90    | 17 |
| NiS <sub>2</sub>                                 | Nanospheres      | 1 M KOH                             | 147 | 105   | 18 |
| CoS <sub>x</sub>                                 | Nanosheets       | 1M KOH                              | 127 | 123   | 19 |
| NiSe <sub>2</sub>                                | Nanosheets       | 1M KOH                              | 184 | 184   | 20 |
| Co <sub>9</sub> S <sub>8</sub> @MoS <sub>2</sub> | Octahedrons/CNFs | 1M KOH                              | 190 | 110   | 21 |
| CoP                                              | Nanowires/CC     | 1M KOH                              | 110 | 129   | 22 |
| Ni <sub>2</sub> P                                | Nanosheets       | 1M KOH                              | 96  | 94    | 23 |
| MoS <sub>2</sub>                                 | Film             | 0.5M H <sub>2</sub> SO <sub>4</sub> | 260 | 50    | 24 |
| WS <sub>2</sub>                                  | Nanosheets       | 0.5M H <sub>2</sub> SO <sub>4</sub> | 250 | 60    | 25 |

**Table S2.** Comparison of the OER performances of Fe<sub>3</sub>S<sub>4</sub> with the best-reported iron sulfide and other reported non-precious OER electrocatalysts.

| Catalyst                           | Morphology    | Electrolyte | Over potential (η <sub>10</sub> ) mV | Tafel Slope (mV dec <sup>-1</sup> ) | Ref.      |
|------------------------------------|---------------|-------------|--------------------------------------|-------------------------------------|-----------|
| Fe <sub>3</sub> S <sub>4</sub>     | Nanosheet     | 1 M KOH     | 230                                  | 50                                  | This work |
| FeS <sub>2</sub> /C/NF             | Nanoparticles | 1 M KOH     | 240                                  | 92                                  | 26        |
| Fe@FeO <sub>x</sub> S <sub>y</sub> | Nanosheet     | 1 M KOH     | 238                                  | 82.7                                | 27        |
| Fe <sub>3</sub> S <sub>4</sub>     | Particles     | 1 M KOH     | 255(η <sub>50</sub> )                | 46                                  | 7         |

|                                                        |                      |           |           |      |    |
|--------------------------------------------------------|----------------------|-----------|-----------|------|----|
| FeNiS <sub>2</sub>                                     | Nanosheet            | 0.1 M KOH | 310       | 46   | 9  |
| CoNi <sub>2</sub> S <sub>4</sub> @CoS <sub>2</sub> /NF | Peapod               | 1 M KOH   | 173       | 51   | 11 |
| Co <sub>9</sub> S <sub>8</sub>                         | Nanowires            | 1 M KOH   | 299       | 67   | 13 |
| CoS <sub>2</sub>                                       | Nanospheres          | 1 M KOH   | 290       | 57   | 14 |
| Co <sub>3</sub> S <sub>4</sub> -L                      | Nanosheet            | 1 M KOH   | 350       | 84.7 | 15 |
| Co(OH) <sub>2</sub> /NiCoS                             | Nanotubes            | 1 M KOH   | 300       | 64   | 17 |
| N-Ni <sub>3</sub> S <sub>2</sub> @C/NF                 | Nanoflakes           | 1 M KOH   | 310(η100) | 75   | 28 |
| NiS <sub>2</sub>                                       | Nanospheres          | 1 M KOH   | 271       | 65   | 29 |
| Ni/NiS/NC                                              | Nanoparticles        | 1 M KOH   | 310       | 75   | 30 |
| CoS                                                    | Thin Film            | 1 M KOH   | 300       | 57   | 31 |
| CoS/CNT                                                | Flower               | 1 M KOH   | 330       | 142  | 32 |
| Co <sub>9</sub> S <sub>8</sub>                         | Nanosheets           | 1M KOH    | 288       | 79   | 33 |
| CoP                                                    | Film                 | 1M KOH    | 345       | 47   | 34 |
| Ni <sub>2</sub> P                                      | Nanosheets           | 1M KOH    | 255       | 57   | 23 |
| NiMnCoS@rGO                                            | Nanoparticles@sheets | 1M KOH    | 320       | 53   | 35 |
| CoP                                                    | Nanosheets           | 1M KOH    | 265       | 63   | 36 |

**Table S3.** Comparison of overall water splitting performances of Fe<sub>3</sub>S<sub>4</sub>||Fe<sub>3</sub>S<sub>4</sub> with the best reported bi-functional electrocatalysts in the basic electrolyte.

| Material                               | Morphology                  | Electrolyte | E at j= 10 mA<br>cm <sup>-2</sup> (V) | Ref.      |
|----------------------------------------|-----------------------------|-------------|---------------------------------------|-----------|
| Fe <sub>3</sub> S <sub>4</sub>         | Nanosheet                   | 1 M KOH     | 1.43                                  | This work |
| FeS <sub>2</sub> /C/NF                 | Nanoparticles               | 1 M KOH     | 1.72                                  | 26        |
| Fe@FeO <sub>x</sub> S <sub>y</sub>     | Nanosheet                   | 1 M KOH     | 1.65                                  | 2         |
| Fe <sub>3</sub> S <sub>4</sub>         | Crumbled sheets             | 1 M KOH     | 1.68                                  | 9         |
| Co <sub>9</sub> S <sub>8</sub>         | Nanowires                   | 1 M KOH     | 1.66                                  | 14        |
| CoS <sub>2</sub>                       | Nanospheres                 | 1 M KOH     | 1.68                                  | 15        |
| Co <sub>3</sub> S <sub>4</sub> -L      | Nanosheet                   | 1 M KOH     | 1.63                                  | 17        |
| Co(OH) <sub>2</sub> /NiCoS             | Nanotubes                   | 1 M KOH     | 1.62                                  | 15        |
| N-Ni <sub>3</sub> S <sub>2</sub> @C/NF | Nanoflakes                  | 1 M KOH     | 1.57                                  | 29        |
| NiS <sub>2</sub>                       | Nanospheres                 | 1 M KOH     | 1.66                                  | 18        |
| Ni/NiS/NC                              | Nanoparticles               | 1 M KOH     | 1.61                                  | 31        |
| NiCoP                                  | Hollow<br>nanobricks        | 1 M KOH     | 1.62                                  | 37        |
| Ni <sub>2</sub> P                      | Nanosheets                  | 1 M KOH     | 1.47                                  | 23        |
| CuO@Ni/NiFe(OH) <sub>2</sub>           | Nanoarrays                  | 1 M KOH     | 1.73                                  | 38        |
| CoP/NF                                 | Crystalline<br>nanomaterial | 1 M KOH     | 1.65                                  | 39        |

|                                |            |         |      |    |
|--------------------------------|------------|---------|------|----|
| CoFeZrO                        | Nanosheet  | 1 M KOH | 1.63 | 40 |
| Co <sub>9</sub> S <sub>8</sub> | Nanosheets | 1M KOH  | 1.55 | 19 |

## Reference

1. E.L. Miller, B. Marsen, B. Cole and M. Lum, *ECS-State Letters*, 2006, **9**, G248-G250.
2. X. Zou, Y. Wu, Y. Liu, D. Liu, W. Li, L. Gu, H. Liu, P. Wang, L. Sun and Y. Zhang, *Chem*, 2018, **4**, 1139-1152.
3. Y. Chen, S. Xu, Y. Li, R.J. Jacob, Y. Kuang, B. Liu, Y. Wang, G. Pastel, L.G. Salamanca - Riba and M.R. Zachariah, *Adv. Energy Mater.*, 2019, **7**, 1700482.
4. J. Jiang, L. Zhu, H. Chen, Y. Sun, W. Qian, H. Lin and S. Han, *J. Mater. Sci.*, 2019, **54**, 1422-1433.
5. J. Jiang, L. Zhu, H. Chen, Y. Sun, H. Lin and S. Han, *J. Alloys and Compd.*, 2019, **775**, 1293-1300.
6. X. Zhao, X. Ma, Q. Lu, Q. Li, C. Han, Z. Xing and X. Yang, *Electrochim. Acta*, 2017, **249**, 72-78.
7. S. Shit, W. Jang, S. Bolar, N.C. Murmu, H. Koo and T. Kuila, *ChemElectroChem*, 2019, **6**, 3199-3208.
8. D.-Y. Wang, M. Gong, H.-L. Chou, C.-J. Pan, H.-A. Chen, Y. Wu, M.-C. Lin, M. Guan, J. Yang and C.-W. Chen, *J. Am. Chem. Soc.*, 2015, **137**, 1587-1592.
9. R. Huang, W. Chen, Y. Zhang, Z. Huang, H. Dai, Y. Zhou, Y. Wu and X. Lv, *J. Colloid Interface Sci.*, 2019, **556**, 401-410.
10. J. Tie, J. Han, G. Diao, J. Liu, Z. Xie, G. Cheng, M. Sun and L. Yu, *Appl. Surf. Sci.*, 2018, **435**, 187-194.
11. C. Zhang, S. Bhojate, P.K. Kahol, K. Siam, T.P. Poudel, S.R. Mishra, F. Perez, A. Gupta, G. Gupta and R.K. Gupta, *ChemNanoMat.*, 2018, **4**, 1240-1246.
12. F. Yu, H. Yao, B. Wang, K. Zhang, Z. Zhang, L. Xie, J. Hao, B. Mao, H. Shen and W. Shi, *Dalton Trans.*, 2018, **47**, 9871-9876.
13. X. Ma, W. Zhang, Y. Deng, C. Zhong, W. Hu and X. Han, *Nanoscale*, 2018, **10**, 4816-4824.
14. M. Zhu, Z. Zhang, H. Zhang, H. Zhang, X. Zhang, L. Zhang and S. Wang, *J. Colloid Interface Sci.*, 2018, **509**, 522-528.
15. F. Wu, X. Guo, G. Hao, Y. Hu and W. Jiang, *J. Solid State Electr.*, 2019, **23**, 2627-2637.
16. Y. Wu, Y. Gao, H. He and P. Zhang, *Appl. Surf. Sci.*, 2019, **480**, 689-696.
17. Q. Hao, S. Li, H. Liu, J. Mao, Y. Li, C. Liu, J. Zhang and C. Tang, *Catal. Sci. Technol.*, 2019, **9**, 3099-3108.
18. X. Shi, X. Ling, L. Li, C. Zhong, Y. Deng, X. Han and W. Hu, *J. Mater. Chem.*, 2019, **7**, 23787-23793.
19. R. Souleyman, Z. Wang, C. Qiao, M. Naveed and C. Cao, *J. Mater. Chem.*, 2018, **6**, 7592-7607.
20. J. Tian, Q. Liu, A.M. Asiri and X. Sun, *J. Am. Chem. Soc.*, 2014, **136**, 7587-7590.
21. N. Jiang, Q. Tang, M. Sheng, B. You, D.-e. Jiang and Y. Sun, *Catal. Sci. Technol.*, 2016, **6**, 1077-1084.
22. H.-W. Liang, S. Brüller, R. Dong, J. Zhang, X. Feng and K. Müllen, *Nat. Commun.*, 2015, **6**, 7992.
23. N. Mushtaq, C. Qiao, H. Tabassum, M. Naveed, M. Tahir, Y. Zhu, M. Naeem, W. Younas and C. Cao, *Sustain. Energy Fuels*, 2020, **4**, 5294-5300.
24. M.-R. Gao, J.-X. Liang, Y.-R. Zheng, Y.-F. Xu, J. Jiang, Q. Gao, J. Li and S.-H. Yu, *Nat. Commun.*, 2015, **6**, 1-7.
25. J. Huang, Y. Sun, Y. Zhang, G. Zou, C. Yan, S. Cong, T. Lei, X. Dai, J. Guo and R. Lu, *Adv. Mater.*, 2018, **30**, 1705045.

26. Z. Li, M. Xiao, Y. Zhou, D. Zhang, H. Wang, X. Liu, D. Wang and W. Wang, *Dalton Trans.*, 2018, **47**, 14917-14923.
27. J. Jiang, S. Lu, H. Gao, X. Zhang and H.-Q. Yu, *Nano Energy*, 2016, **27**, 526-534.
28. J. Ding, S. Ji, H. Wang, H. Gai, F. Liu, V. Linkov and R. Wang, *Int. J. Hydrog. Energy*, 2019, **44**, 2832-2840.
29. S.B. Kale, A.C. Lokhande, R.B. Pujari and C.D. Lokhande, *J. Colloid Interface Sci.*, 2018, **532**, 491-499.
30. K. Prabakaran, M. Lokanathan and B. Kakade, *Appl. Surf. Sci.*, 2019, **466**, 830-836.
31. F. Song and X. Hu, *Nat. Commun.*, 2014, **5**, 1-9.
32. M. Chauhan, K.P. Reddy, C.S. Gopinath and S. Deka, *ACS Catal.*, 2017, **7**, 5871-5879.
33. R. Miao, J. He, S. Sahoo, Z. Luo, W. Zhong, S.-Y. Chen, C. Guild, T. Jafari, B. Dutta and S.A. Cetegen, *ACS Catal.*, 2017, **7**, 819-832.
34. J. Li, J. Li, X. Zhou, Z. Xia, W. Gao, Y. Ma and Y. Qu, *ACS Appl. Mater. Interfaces*, 2016, **8**, 10826-10834.
35. S. Rafai, C. Qiao, Z. Wang, C. Cao, T. Mahmood, M. Naveed, W. Younas and S. Khalid, *ChemElectroChem*, 2019, **6**, 5469-5478.
36. E. Hu, Y. Feng, J. Nai, D. Zhao, Y. Hu and X.W.D. Lou, *Energy Environ. Sci.*, 2018, **11**, 872-880.
37. S. Li, X. Wang, M. Li, J. Liu, C. Li, H. Wu, D. Guo, F. Ye, S. Wang and L. Cheng, *Electrochim. Acta*, 2019, **319**, 561-568.
38. Y. Liu, Z. Jin, X. Tian, X. Li, Q. Zhao and D. Xiao, *Electrochim. Acta*, 2019, **318**, 695-702.
39. R. Beltrán-Suito, P.W. Menezes and M. Driess, *J. Mater. Chem.*, 2019, **7**, 15749-15756.
40. L. Huang, D. Chen, G. Luo, Y.R. Lu, C. Chen, Y. Zou, C.L. Dong, Y. Li and S. Wang, *Adv. Mater.*, 2019, **31**, 1901439.
